# Supplementary material
Source: PubMed Central journal article supplement (PMC2734507)
Supplement: NIHMS130505-supplement-Supplementary_Data.pdf [file NIHMS130505-supplement-Supplementary_Data.pdf]

## Supplementary Methods

**Chemicals and materials.** Oleic acid (Sigma-Aldrich) and 10%BSA (essentially fatty acid free, Sigma-Aldrich) were used to make a 7.5 mM stock solution (5:1 oleic acid:BSA molar ratio)<sup>31</sup>. BODIPY493/503 was from Invitrogen.

**Cell culture.** *Drosophila* S2 cells were cultured in Schneider's *Drosophila* medium (Invitrogen) supplemented with 10% fetal bovine serum and antibiotics (100 unit/ml penicillin and 100 µg/ml streptomycin) at 25°C as described<sup>32</sup>. RNAi treatment of S2 cells were performed as previously described<sup>10</sup>. A segment of pBluescript backbone was used as the template for control RNAi (referred as control RNAi thereafter). Transfection of S2 cells was performed using Cellfectin reagent (Invitrogen). Images of live cells were taken using LSM 510 confocal microscope (Carl Zeiss MicroImaging) with a 63× oil immersion lens.

For Arf/COPI specificity experiments (Figure 4), controls included knockdowns of COPII (*sar1*, *sec12*, *sec24* and *sec13*), clathrin (*Chc* and *Clc*), other ARFs (ARF4: *Arf102F*, ARF6: *Arf51F*, ARL1: *Arf72A*, ARL2: *Arf84F* and ARL3: *CG6560*), GEFs (*sec71* and *CG31158*), and GAPs (*ArfGAP1* and *Gap69C*).

**Electron microscopy.** RNAi treated cells were cultured with 1 mM oleate incubation for 24 hours, fixed in 1.5% glutaraldehyde, 4% polyvinylpyrrolidone, 0.05% calcium chloride, 0.1M sodium cacodylate, pH 7.4, on ice, and then pelleted. The samples were stained for lipid using an imidazole-buffered osmium tetroxide method<sup>33</sup>, then block-stained in 2% uranyl acetate overnight at 4°C, dehydrated, infiltrated and embedded in LX-112 resin (Ladd Research Industries). Samples were sectioned ultrathin (65 nm) on a Reichert Ultracut S ultramicrotome and stained with 0.8% lead citrate. Grids were examined on a JEOL JEM-1230 electron microscope (JEOL, USA Inc.) and photographed using the Gatan Ultrascan 1000 digital camera (Gatan, Inc.).

**Visual image analyses of the RNAi screen.** Both the first (15,683 genes; whole genome) and second (847 repeated genes) data sets were scored visually by the same two independent observers who were blinded to gene identities. In total, nearly 95,000 images (15,643 genes, with 6 images per gene), each with several hundred cells, were examined visually. For visual scoring, a MATLAB script was utilized that allowed lipid droplets in each image (six per gene) to be scored for three criteria: number (more, normal, fewer), size (smaller, normal, larger), and dispersion (more, normal, less). These scores were imported to a spreadsheet to compile a hit list. In the first round of visual scoring, hits were defined as those genes identified as abnormal by both observers. The same observers and procedures were used in the visual screen of the repeat data set.

**Automated image analyses.** Both the initial and repeat data sets were analyzed by automated image analysis. DAPI and BODIPY images from the initial screen were analyzed by using a series of MATLAB scripts (for a detailed description see [http://mpibcms.biochem.mpg.de/en/rg/lipidrophe/absatz\\_01.html](http://mpibcms.biochem.mpg.de/en/rg/lipidrophe/absatz_01.html)). In short, DAPI images were used to segment the images into individual cells by using Otsu's thresholding<sup>34</sup> and watershed segmentation from the image processing toolbox. Similarly, the BODIPY signal outline was determined by thresholding. The cell shapes were overlaid on the BODIPY image and several parameters of the BODIPY signal (*e.g.*, size, intensity, and numbers of clusters) were measured and averaged per cell, excluding cells at the boundary of the image and cell clumps. Images with few cells were flagged, as were images with abnormal DAPI signals. Among the parameters, the total signal per image, and the number of clusters and the mean signal per cell proved most useful and were further used for statistical analysis. In particular, for descriptive statistics, the interquartile range (IQR) was determined for the values of each parameter and conditions that resulted in a signal more than 1.5 deviant from the lower (0.25) or higher (0.75) percentile were considered hits for this category. Lists of hits for each category were compiled in a spreadsheet and compared with the results from visual screening.

**Quantitative PCR.** dsRNAs (16  $\mu$ g) were added to individual wells of 6-well plates. After 4 days, cells were harvested and lysed in RNA-Stat-60 (Tel-test). Total RNA (1.5  $\mu$ g) was used to synthesize first-strand cDNAs by using SuperscriptIII reverse transcriptase and random hexamer primers (Invitrogen).

Real-time quantitative PCR was performed with the ABI Perkin Elmer Prism 7700 (Applied Biosystems) and SYBR green detection of amplified products. Each 25 $\mu$ l PCR reaction mix contained 2 $\mu$ l cDNA, 12.5 $\mu$ l 2x SYBR Green master mixture (Qiagen) and 600 nM of primers (*midway* forward: 5'-CCAAGCTGGTGCAATATCCT-3', *midway* reverse: 5'-CACCACCTCCAATAAACGCT-3', *Arf79F* forward: 5'-GTCGCCTGGATGTACCAGTT-3', *Arf79F* reverse: 5'-GTATCGGTGAGGCGAGAGAG-3', *Aldh* forward: 5'-GAGGGCCTACCCGGCTACT-3', and *Aldh* reverse: 5'-CTCCCTTGCAATGGTCATATCA-3'). *Aldh* (Aldehyde dehydrogenase)<sup>35</sup> was used as an internal reference gene.

***Saccharomyces cerevisiae* studies.** Strains examined were wild-type (Cry1, W303), a control strain ( $\Delta 4$ ) lacking neutral lipid synthesis enzymes (*Dgal*, *Lro1*, *Are1*, *Are2*) and lipid droplets (a gift from Sten Stymne), and *Δarf1* (W303). Yeast strains were cultured in YPD media. At O.D.600 = 0.8, aliquots were taken from culture and BODIPY (1 $\mu$ g/ml) dye was added. Images were obtained with a LSM 510 confocal microscope (Carl Zeiss MicroImaging).

**Endoribonuclease-prepared short-interfering RNA (esiRNA) treatment of hepatoma cells and HeLa cells.** esiRNAs targeting ARF1 (mammalian homolog of *Arf79F*), GBF1 (mammalian homolog of *garz*), ARCN1 (mammalian homolog of *δCop*), FASN (mammalian homolog of FAS), SREBF1 (mammalian homolog of SREBP) and SCAP were generated with published methods<sup>36,37</sup>. The endonuclease RNaseIII was a gift from Barbara Panning. Purified esiRNAs (20ng) were transfected with Lipofectamine (Invitrogen) into Huh7 human hepatoma cell line (provided by Melanie Ott) in 24-well plates. After culture for 40 h in DMEM medium, 1 mM oleate was added to the medium and cells were incubated for another 24 h. Cells were then stained with BODIPY and imaged with LSM 510 confocal microscope (Carl Zeiss MicroImaging). Similar approach was performed for HeLa cell RNAi treatment with the exception of transfection with DharmFECT (Dharmacon) for 30 h before loading with 1 mM Oleate.

### References for Methods

31. Stone, S. J. et al. Lipopenia and skin barrier abnormalities in DGAT2-deficient mice. *J Biol Chem* **279**, 11767-76 (2004).
32. Clemens, J. C. et al. Use of double-stranded RNA interference in Drosophila cell lines to dissect signal transduction pathway. *Proc Natl Acad Sci U S A* **97**, 6499-503 (2000).
33. Angermüller, S. & Fahimi, H. D. Imidazole-buffered osmium tetroxide: An excellent stain for visualization of lipids in transmission electron microscopy. *Histochem. J.* **14**, 823–835 (1982).
34. Otsu, N. A threshold selection method from gray-level histograms. *IEEE Trans Syst Man Cybern* **9**, 62-66 (1979).
35. Seegmiller, A. C. et al. The SREBP pathway in Drosophila: regulation by palmitate, not sterols. *Dev Cell* **2**, 229-38 (2002).
36. Yang, D. et al. Short RNA duplexes produced by hydrolysis with Escherichia coli RNase III mediate effective RNA interference in mammalian cells. *Proc Natl Acad Sci U S A* **99**, 9942-7 (2002).
37. Kittler, R., Heninger, A. K., Franke, K., Habermann, B. & Buchholz, F. Production of endoribonuclease-prepared short interfering RNAs for gene silencing in mammalian cells. *Nat Methods* **2**, 779-84 (2005).
38. Cermelli, S., Guo, Y., Gross, S. P., Welte, M.A. The lipid-droplet proteome reveals that droplets are a protein-storage depot. *Curr Biol.* **16**, 1783-95 (2006).

## Supplementary Materials

Table S1. Genes with dramatically altered lipid droplet morphology identified in screen.

Table S2. Genes with moderately altered lipid droplet morphology identified in screen.

Table S3. Genes identified in screen by automated analysis

### Movies

Movie S1 Projection movie of S2 cells loaded with oleate.

Movie S2 Projection movie of *Cct1* knockdown cells loaded with oleate.

### Figures

Fig. S1. Knock down of selected genes by RNAi treatment. (a) *Drosophila* S2 cells were treated with 500-bp dsRNA for 3 days to knockdown with control RNAi (middle column) or *midway* (right column). RNA was extracted and the mRNA levels for *midway* were measured by real time-PCR and compared with those from control cells (middle column). (b) The mRNA expression level for knockdown of *Arf79F* was analyzed analogously to (a). (\*\*\*)  $P < 0.00001$  vs control)

Fig. S2. Lipid droplets fuse in cells with knockdown of *Cct1*. S2 cells were treated with RNAi as described for the screen, incubated with 1mM oleate-containing medium, and imaged by confocal time-lapse microscopy. Images shown span 30 min and show three-dimensional projections of a lipid droplet before (left), during (middle), and after fusion (right).

Fig. S3. Ultrastructure of control and *mdy*, *Arf79F* and *Cct1* knockdown cells after oleate loading. Cells were treated with RNAi for 3 days, then incubated with medium containing 1mM oleate for 24 h, and prepared for electron microscopy as described in Methods. Representative images are shown.

Fig. S4. Phenotypes of ARF1 deletion in yeast and ARF1 knockdown in human hepatoma (Huh7) cells and HeLa cells. (a) Huh7 cells were treated with esiRNA against ARF1 (mammalian homolog of *Arf79F*), GBF1 (mammalian homolog of *garz*), ARCN1 (mammalian homolog of *δCOP*), FASN (mammalian homolog of FAS), SREBF1 (mammalian homolog of SREBP), SCAP or a control esiRNA for 40 h and then incubated with 1 mM Oleate for 24 h, fixed and stained for lipid droplets with BODIPY.

Representative confocal sections are shown. (b) HeLa cells were treated with esiRNA against control, ARF1 or GBF1 for 30 h and loaded with 1mM Oleate for 24 h, stained for droplets with BODIPY and imaged on confocal microscope. The overall transfection efficiency for esiRNA was low (~10% for Huh7 cells and 50% for HeLa cells). Shown in (a) and (b) are representative images that were selected on the basis of droplet phenotypes that were similar to those observed in *Drosophila* cells and not in control knockdown cells. (c) Live yeast cells with *ARF1* deletion were stained with BODIPY and imaged by confocal microscopy. Controls were wild-type yeast (left) and Δ4 (middle), a strain with deletions of four enzymes of neutral lipid synthesis (*Dgal*, *Lrol*, *Arel*, and *Are2*) that was kindly provided by Dr. S. Szymne

(Uppsala, Sweden). Droplets were more numerous in *ARF1* deletion mutants. Scale bar = 10  $\mu\text{m}$  in (a), 5  $\mu\text{m}$  in (b) and 3  $\mu\text{m}$  in (c).

Fig. S5. Effect of BFA on droplet formation in *Drosophila* S2 cells. Two representative cells are shown for each condition. Lipid droplets were stained by BODIPY and Golgi stacks were stained with anti-*Drosophila* Golgi antibody (CalBiochem). Pre-treatment of 10  $\mu\text{g/ml}$  BFA for 30 minutes before oleate loading leads to collapse of Golgi stacks and droplet phenotype similar to *ARF1/COPI* knockdowns.

**Table S1. Genes with dramatically altered lipid droplet morphology identified in screen****Class I Fewer lipid droplets**

| CG#     | Symbol    | Function                                                 |
|---------|-----------|----------------------------------------------------------|
| CG10370 | Tbp-1     | endopeptidase activity                                   |
| CG31991 | mdy       | diacylglycerol O-acyltransferase activity                |
| CG1395  | stg       | protein tyrosine/serine/threonine phosphatase activity   |
| CG5363  | cdc2      | cyclin-dependent protein kinase activity                 |
| CG5940  | CycA      | cyclin-dependent protein kinase regulator activity       |
| CG8975  | RnrS      | ribonucleoside-diphosphate reductase activity            |
| CG10484 | Dox-A2    | endopeptidase activity                                   |
| CG4904  | Pros35    | endopeptidase activity                                   |
| CG3329  | Prosbeta2 | endopeptidase activity; threonine endopeptidase activity |
| CG10938 | ProsMA5   | endopeptidase activity                                   |
| CG7762  | Rpn1      | endopeptidase activity                                   |
| CG1341  | Rpt1      | endopeptidase activity; ATPase activity                  |
| CG16916 | Rpt3      | endopeptidase activity                                   |
| CG3455  | Rpt4      | endopeptidase activity                                   |
| CG3328  |           | caspase activity                                         |
| CG7425  | eff       | ubiquitin-protein ligase activity                        |
| CG32744 | Ubi-p5E   | protein binding                                          |
| CG7292  | Rrp6      | 3'-5' exonuclease activity                               |
| CG32782 | tlk       | protein serine/threonine kinase activity                 |
| CG8877  | prp8      | RNA splicing factor activity                             |
| CG5352  | SmB       | RNA splicing factor activity                             |
| CG10753 | snRNP69D  | RNA splicing factor activity                             |
| CG1249  |           | RNA splicing factor activity                             |
| CG4849  | eEF2      | translation elongation factor activity                   |
| CG14641 |           | mRNA binding; nucleic acid binding                       |
| CG3578  | bi        | RNA polymerase II transcription factor activity          |
| CG7951  | sima      | RNA polymerase II transcription factor activity          |
| CG7552  | CG33967   | unknown                                                  |

**Class II Smaller size lipid droplets, more dispersed**

| CG#     | Symbol        | Function                                                   |
|---------|---------------|------------------------------------------------------------|
| CG10859 |               | motor activity; dynein complex                             |
| CG10822 |               | ATPase activity, coupled; dynein complex                   |
| CG8732  | * I(2)44DEa   | long-chain-fatty-acid-CoA ligase activity                  |
| CG8055  | shrb          | carrier activity                                           |
| CG4916  | me31B         | ATP-dependent RNA helicase activity                        |
| CG6718  |               | calcium-independent phospholipase A2 activity              |
| CG1318  | Hexo1         | beta-N-acetylhexosaminidase activity; hydrolase activity   |
| CG1100  | Rpn5          | endopeptidase activity                                     |
| CG9454  |               | serine-type endopeptidase inhibitor activity               |
| CG5119  | * pAbp        | poly(A) binding                                            |
| CG11276 | * RpS4        | structural constituent of ribosome; nucleic acid binding   |
| CG6501  | Ngp           | GTP binding; receptor binding                              |
| CG31196 | 14-3-3epsilon | DAG-activated phospholipid-dep. protein kinase C inhibitor |
| CG3889  | CSN1b         | small GTPase regulator activity; signalosome               |

|         |           |                                                          |
|---------|-----------|----------------------------------------------------------|
| CG18332 | CSN3      | unknown; signalosome                                     |
| CG2038  | CSN7      | unknown; signalosome                                     |
| CG5179  | Cdk9      | cyclin-dependent protein kinase activity                 |
| CG7035  | Cbp80     | RNA cap binding                                          |
| CG3180  | RpII140   | DNA-directed RNA polymerase activity                     |
| CG7885  | RpII33    | DNA-directed RNA polymerase activity                     |
| CG6711  | Taf2      | RNA polymerase II transcription factor activity          |
| CG7957  | MED17     | RNA polymerase II transcription mediator activity        |
| CG13867 | MED8      | RNA polymerase II transcription mediator activity        |
| CG18009 | Trf2      | RNA polymerase II transcription factor activity          |
| CG1343  | Sp1       | RNA polymerase II transcription factor activity          |
| CG7664  | crp       | RNA polymerase II transcription factor activity          |
| CG31666 |           | transcription factor activity                            |
| CG2252  | fs(1)h    | DNA binding; protein kinase activity                     |
| CG4817  | Ssrp      | single-stranded DNA binding; single-stranded RNA binding |
| CG9007  |           | protein binding; zinc ion binding                        |
| CG4429  | Rbp2      | translation initiation factor activity; mRNA binding     |
| CG9075  | eIF-4a    | translation initiation factor activity                   |
| CG9677  | Int6      | translation initiation factor activity                   |
| CG9769  | eIF3-S5   | translation initiation factor activity                   |
| CG32104 |           | ATP binding; ATPase activity; calcium ion binding        |
| CG1715  | I(3)03670 | unknown                                                  |
| CG6729  |           | unknown                                                  |
| CG9170  |           | unknown                                                  |
| CG9578  |           | unknown                                                  |
| CG10933 |           | unknown                                                  |
| CG14220 |           | unknown                                                  |
| CG15009 | ImpL2     | unknown                                                  |

---

**Class III Normal/larger size lipid droplets, more dispersed**


---

| CG#     | Symbol   | Function                                            |
|---------|----------|-----------------------------------------------------|
| CG8385  | Arf79F   | GTP binding; GTPase activity                        |
| CG8487  | garz     | ARF guanyl-nucleotide exchange factor activity      |
| CG7961  | alphaCop | binding; protein transporter activity; COPI complex |
| CG6223  | betaCop  | binding; COPI complex                               |
| CG6699  | beta'Cop | protein transporter activity; COPI complex          |
| CG14813 | deltaCOP | COPI complex                                        |
| CG1528  | gammaCop | binding; COPI complex                               |
| CG3948  | zetaCOP  | COPI complex                                        |

---

**Class IV Normal/larger size lipid droplets, highly condensed**


---

| CG#    | Symbol    | Function                                                     |
|--------|-----------|--------------------------------------------------------------|
| CG8053 | eIF-1A    | translation initiation factor activity                       |
| CG4153 | eIF-2beta | translation initiation factor activity                       |
| CG8636 | eIF3-S4   | translation initiation factor activity                       |
| CG4954 | eIF3-S8   | translation initiation factor activity                       |
| CG4878 | eIF3-S9   | translation initiation factor activity                       |
| CG7490 | RpLPO     | DNA-(apurinic or apyrimidinic site) lyase activity; ribosome |
| CG5844 |           | hydro-lyase activity; oxidoreductase activity                |



**Class V Fewer lipid droplets, larger size**

| CG#     | Symbol | Function                                                   |
|---------|--------|------------------------------------------------------------|
| CG1049  | Cct1   | choline-phosphate cytidyltransferase activity              |
| CG18330 | Cct2   | choline-phosphate cytidyltransferase activity              |
| CG2201  | CK     | choline kinase activity; ethanolamine kinase activity      |
| CG8522  | HLH106 | transcription factor activity; SREBP                       |
| CG33131 | SCAP   | sterol regulatory element binding-protein (SREBP) cleavage |
| CG3523  | FAS    | fatty-acid synthase activity                               |

**Ribosomal protein encoding genes [1]**

| CG#     | Symbol    | Function                                                     |
|---------|-----------|--------------------------------------------------------------|
| CG12275 | RpS10a    | structural constituent of ribosome; nucleic acid binding     |
| CG8332  | * RpS15   | structural constituent of ribosome; nucleic acid binding     |
| CG8922  | RpS15a    | structural constituent of ribosome; nucleic acid binding     |
| CG12324 | * RpS15Ab | structural constituent of ribosome; nucleic acid binding     |
| CG8900  | * RpS18   | structural constituent of ribosome; nucleic acid binding     |
| CG15693 | * RpS20   | structural constituent of ribosome; nucleic acid binding     |
| CG15697 | RpS30     | structural constituent of ribosome; nucleic acid binding     |
| CG14792 | sta       | structural constituent of ribosome; nucleic acid binding     |
| CG8857  | RpS11     | structural constituent of ribosome; nucleic acid binding     |
| CG2033  | * RpS15Aa | structural constituent of ribosome; nucleic acid binding     |
| CG4046  | * RpS16   | structural constituent of ribosome; nucleic acid binding     |
| CG3922  | * RpS17   | structural constituent of ribosome; nucleic acid binding     |
| CG4464  | * RpS19a  | structural constituent of ribosome; nucleic acid binding     |
| CG8415  | RpS23     | structural constituent of ribosome; nucleic acid binding     |
| CG3751  | RpS24     | structural constituent of ribosome; nucleic acid binding     |
| CG6779  | * RpS3    | DNA-(apurinic or apyrimidinic site) lyase activity; ribosome |
| CG2168  | * RpS3A   | structural constituent of ribosome; nucleic acid binding     |
| CG10944 | * RpS6    | structural constituent of ribosome; nucleic acid binding     |
| CG7808  | * RpS8    | structural constituent of ribosome; nucleic acid binding     |
| CG5920  | * sop     | structural constituent of ribosome; nucleic acid binding     |
| CG17521 | RpL10     | structural constituent of ribosome; nucleic acid binding     |
| CG7283  | RpL10Ab   | structural constituent of ribosome; nucleic acid binding     |
| CG4651  | * RpL13   | structural constituent of ribosome; nucleic acid binding     |
| CG1475  | RpL13A    | structural constituent of ribosome; nucleic acid binding     |
| CG3203  | RpL17     | structural constituent of ribosome; nucleic acid binding     |
| CG8615  | RpL18     | structural constituent of ribosome; nucleic acid binding     |
| CG6846  | RpL26     | structural constituent of ribosome; nucleic acid binding     |
| CG4759  | RpL27     | structural constituent of ribosome; nucleic acid binding     |
| CG15442 | RpL27A    | structural constituent of ribosome; nucleic acid binding     |
| CG12740 | RpL28     | structural constituent of ribosome; nucleic acid binding     |
| CG1821  | RpL31     | structural constituent of ribosome; nucleic acid binding     |
| CG7939  | RpL32     | structural constituent of ribosome; nucleic acid binding     |
| CG4111  | * RpL35   | structural constituent of ribosome; nucleic acid binding     |
| CG7622  | RpL36     | structural constituent of ribosome; nucleic acid binding     |
| CG5502  | * RpL4    | structural constituent of ribosome; nucleic acid binding     |
| CG2960  | RpL40     | structural constituent of ribosome; nucleic acid binding     |
| CG11522 | RpL6      | structural constituent of ribosome; nucleic acid binding     |

|        |       |                                                          |
|--------|-------|----------------------------------------------------------|
| CG4897 | RpL7  | structural constituent of ribosome; nucleic acid binding |
| CG3314 | RpL7A | structural constituent of ribosome; nucleic acid binding |
| CG1263 | RpL8  | structural constituent of ribosome; nucleic acid binding |
| CG6141 | RpL9  | structural constituent of ribosome; nucleic acid binding |

Note: \* previously identified from *Drosophila* embryonic lipid droplet proteome (ref. 37)

[1] A subset of the most striking genes (41 of the 132) encoded ribosome components and associated proteins. These genes showed a distinct phenotype with more dispersed droplets similar to Class III. However, phase contrast images of these knockdowns revealed decreased cell numbers and multiple large vacuolar structures throughout the cells, suggesting that the cells may not be healthy. It is presently not clear whether these genes involved in protein synthesis are directly involved in lipid droplet biology, or whether their knockdowns result in a non-specific effect on cell viability.

**Table S2 Genes with moderately altered lipid droplet morphology identified in screen****Class I Fewer lipid droplets**

| CG#     | Symbol | Function                                           |
|---------|--------|----------------------------------------------------|
| CG3938  | CycE   | cyclin-dependent protein kinase regulator activity |
| CG10800 | Rca1   | unknown                                            |
| CG11888 | Rpn2   | endopeptidase activity                             |
| CG1404  | * ran  | GTPase activity; protein binding; GTP binding      |
| CG16792 | DebB   | RNA splicing factor activity                       |
| CG2189  | Dfd    | RNA polymerase II transcription factor activity    |
| CG8264  | Bx42   | unknown                                            |
| CG12750 | ncm    | unknown                                            |

**Class II More lipid droplets, smaller size and more dispersed**

| CG#     | Symbol    | Function                                                         |
|---------|-----------|------------------------------------------------------------------|
| CG3887  |           | selenium binding                                                 |
| CG12235 | Arp11     | structural constituent of cytoskeleton; actin binding            |
| CG9750  | rept      | DNA helicase activity                                            |
| CG17821 |           | acyltransferase activity                                         |
| CG17654 | Eno       | phosphopyruvate hydratase activity                               |
| CG9595  | osm-6     | microtubule motor activity; kinesin complex                      |
| CG7033  | *         | ATPase activity, coupled; unfolded protein binding               |
| CG3018  | lwr       | ubiquitin-protein ligase activity                                |
| CG4320  | raptor    | binding; protein modification                                    |
| CG11622 | Rlip      | Ral GTPase activator activity                                    |
| CG4012  | gek       | protein serine/threonine kinase activity; small GTPase regulator |
| CG4700  | Sema-2a   | receptor activity                                                |
| CG8606  | RhoGEF4   | Rho guanyl-nucleotide exchange factor activity                   |
| CG11870 |           | protein serine/threonine kinase activity                         |
| CG12344 |           | GABA receptor activity                                           |
| CG13995 |           | G-protein coupled receptor activity                              |
| CG17060 | Rab10     | GTPase activity                                                  |
| CG9575  | * Rab35   | GTPase activity                                                  |
| CG6197  |           | transcription regulator activity                                 |
| CG11266 |           | mRNA binding; nucleotide binding                                 |
| CG12267 |           | DNA-directed RNA polymerase activity                             |
| CG12254 | MED25     | RNA polymerase II transcription mediator activity                |
| CG3886  | Psc       | transcription regulator activity                                 |
| CG11799 | Mnf       | transcription factor activity                                    |
| CG17328 |           | transcription regulator activity                                 |
| CG10986 | g         | binding; intracellular transport                                 |
| CG7861  |           | protein folding                                                  |
| CG9636  |           | unknown                                                          |
| CG8087  |           | unknown                                                          |
| CG9432  | l(2)01289 | protein disulfide isomerase activity                             |
| CG13605 |           | protein binding; zinc ion binding                                |
| CG31386 |           | unknown                                                          |
| CG1524  | RpS14a    | structural constituent of ribosome; nucleic acid binding         |
| CG8495  | RpS29     | structural constituent of ribosome; nucleic acid binding         |

CG1258 [1] pav microtubule motor activity; kinesin complex  
 CG13345 [1] tum Rho GTPase activator activity

---

**Class IV Normal/larger size lipid droplets, condensed**

---

| CG#    | Symbol | Function                                        |
|--------|--------|-------------------------------------------------|
| CG2260 |        | unknown                                         |
| CG3992 | srp    | RNA polymerase II transcription factor activity |

---

**Class V Fewer lipid droplets, larger size**

---

| CG#     | Symbol    | Function             |
|---------|-----------|----------------------|
| CG2503  | atms      | kinesin binding      |
| CG11700 | Ubiquitin | protein modification |

Note: \* previously identified from *Drosophila* embryonic lipid droplet proteome (ref. 37)  
 [1] defect in cytokinesis, with large multinucleated cells

**Table S3. Genes identified in screen by automated analysis**

| CG#     | Note  | Symbol    | Function                                                       |
|---------|-------|-----------|----------------------------------------------------------------|
| CG17608 | T     | fu12      | 1-acylglycerol-3-phosphate O-acyltransferase activity          |
| CG9390  | T     | AcCoAS    | acetate-CoA ligase activity                                    |
| CG7379  | C     |           | acetyltransferase activity; protein binding                    |
| CG10996 | M     |           | aldose 1-epimerase activity                                    |
| CG9143  | C     |           | ATP-dependent RNA helicase activity                            |
| CG32465 | T     | CG34127   | carboxylesterase activity                                      |
| CG7094  | T     |           | casein kinase I activity                                       |
| CG5452  | M     | dnk       | deoxynucleoside kinase activity; ATP binding                   |
| CG16713 | T     |           | erine-type endopeptidase inhibitor activity                    |
| CG7440  | T,M,C | tgyl      | galactosyltransferase activity                                 |
| CG9042  | T     | Gpdh      | glycerol-3-phosphate dehydrogenase (NAD+) activity             |
| CG12530 | T     | Cdc42     | GTPase activity                                                |
| CG8287  | M     | Rab8      | GTPase activity                                                |
| CG3949  | M     | hoip      | mRNA binding; structural constituent of ribosome               |
| CG11027 | T     | Arf102F   | NAD(P)+-protein-arginine ADP-ribosyltransferase activity       |
| CG7368  | T     |           | nucleic acid binding; zinc ion binding                         |
| CG7054  | T     |           | phosphatidylethanolamine binding; kinase inhibitor activity    |
| CG9060  | T     | Zpr1      | protein binding; zinc ion binding                              |
| CG1210  | M     | Pk61C     | protein serine/threonine kinase activity                       |
| CG9635  | M     | RhoGEF2   | Rho guanyl-nucleotide exchange factor activity                 |
| CG7269  | T     | Hel25E    | RNA helicase activity                                          |
| CG7577  | C     | ppk20     | serine-type peptidase activity                                 |
| CG7352  | T     |           | structural constituent of cytoskeleton                         |
| CG7627  | T,C   |           | ATPase activity; transporter activity                          |
| CG15319 | M     | nej       | transcription coactivator activity; acetyltransferase activity |
| CG6964  | M     | Gug       | transcription corepressor activity                             |
| CG17888 | T     | Pdp1      | transcription factor activity                                  |
| CG7734  | C     | shn       | transcription factor activity                                  |
| CG9954  | C     | maf-S     | transcription factor activity                                  |
| CG10543 | T     |           | transcription regulator activity                               |
| CG7036  | C     | rno       | transcription regulator activity                               |
| CG7372  | C     |           | transcription regulator activity                               |
| CG8950  | T     |           | transcription regulator activity                               |
| CG2238  | M     | Ef2b      | translation elongation factor activity                         |
| CG9596  | T     |           | translation initiation factor activity                         |
| CG7375  | T,C   |           | ubiquitin-protein ligase activity                              |
| CG11132 | M     | DMAP1     | unknown                                                        |
| CG16783 | T     | fzr2      | unknown                                                        |
| CG30118 | C     |           | unknown                                                        |
| CG3885  | M     | sec3      | unknown                                                        |
| CG5114  | M     |           | unknown                                                        |
| CG5308  | C     | dpr5      | unknown                                                        |
| CG7085  | T     | l(2)s5379 | unknown                                                        |
| CG7946  | T     |           | unknown                                                        |
| CG8309  | T     | Tango7    | unknown                                                        |
| CG9047  | T     |           | unknown                                                        |
| CG9422  | T     |           | unknown                                                        |

Note: T: altered total signal  
M: altered mean signal  
C: altered cluster number

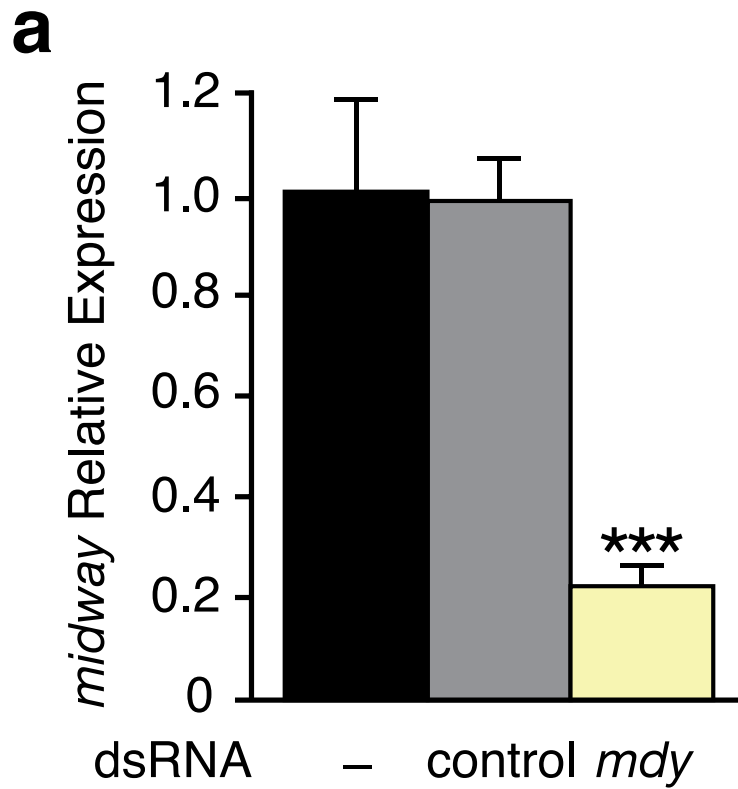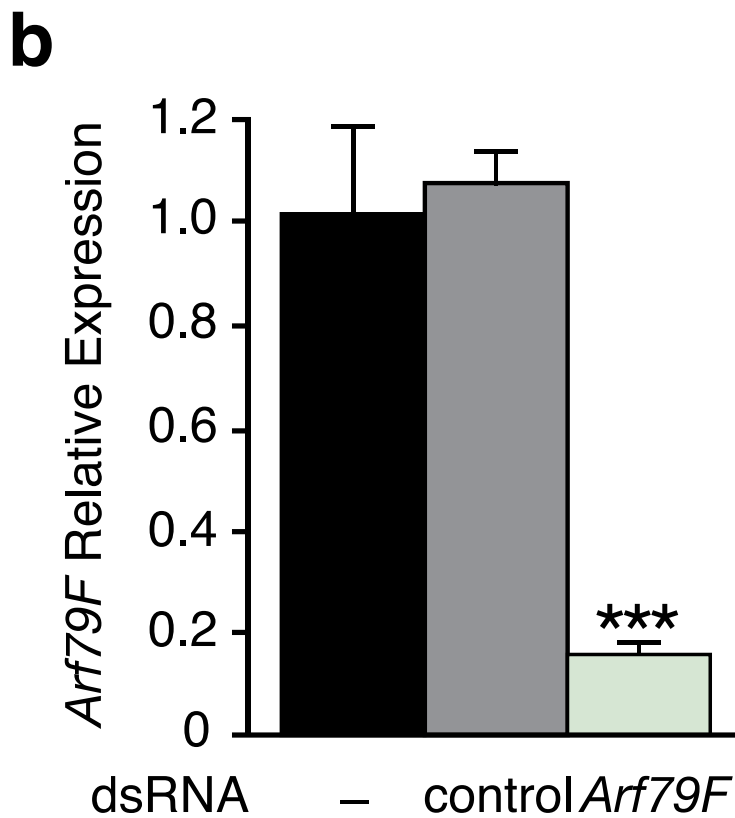Farese *et al*, Figure S1

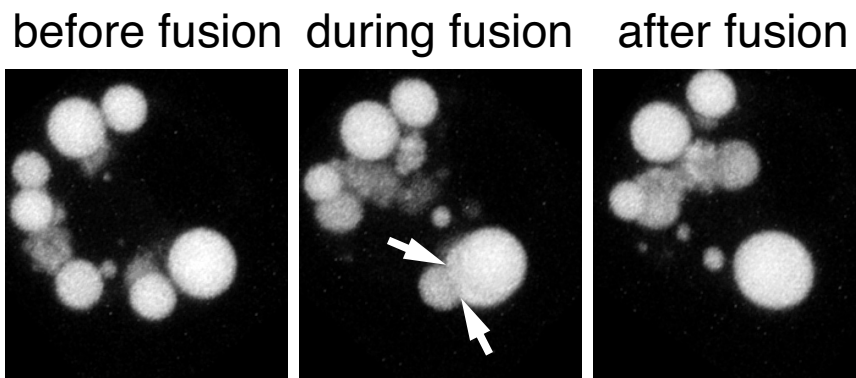

Farese *et al*, Figure S2



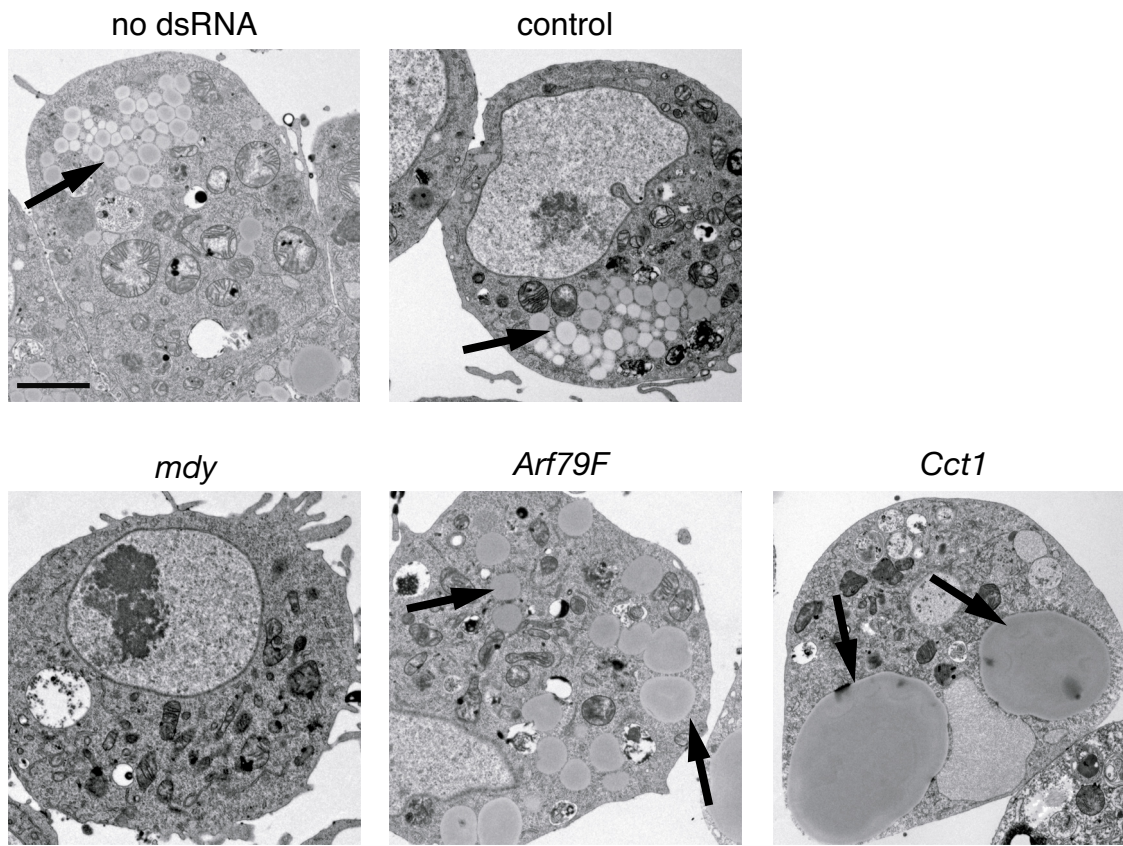

Farese *et al*, Figure S3

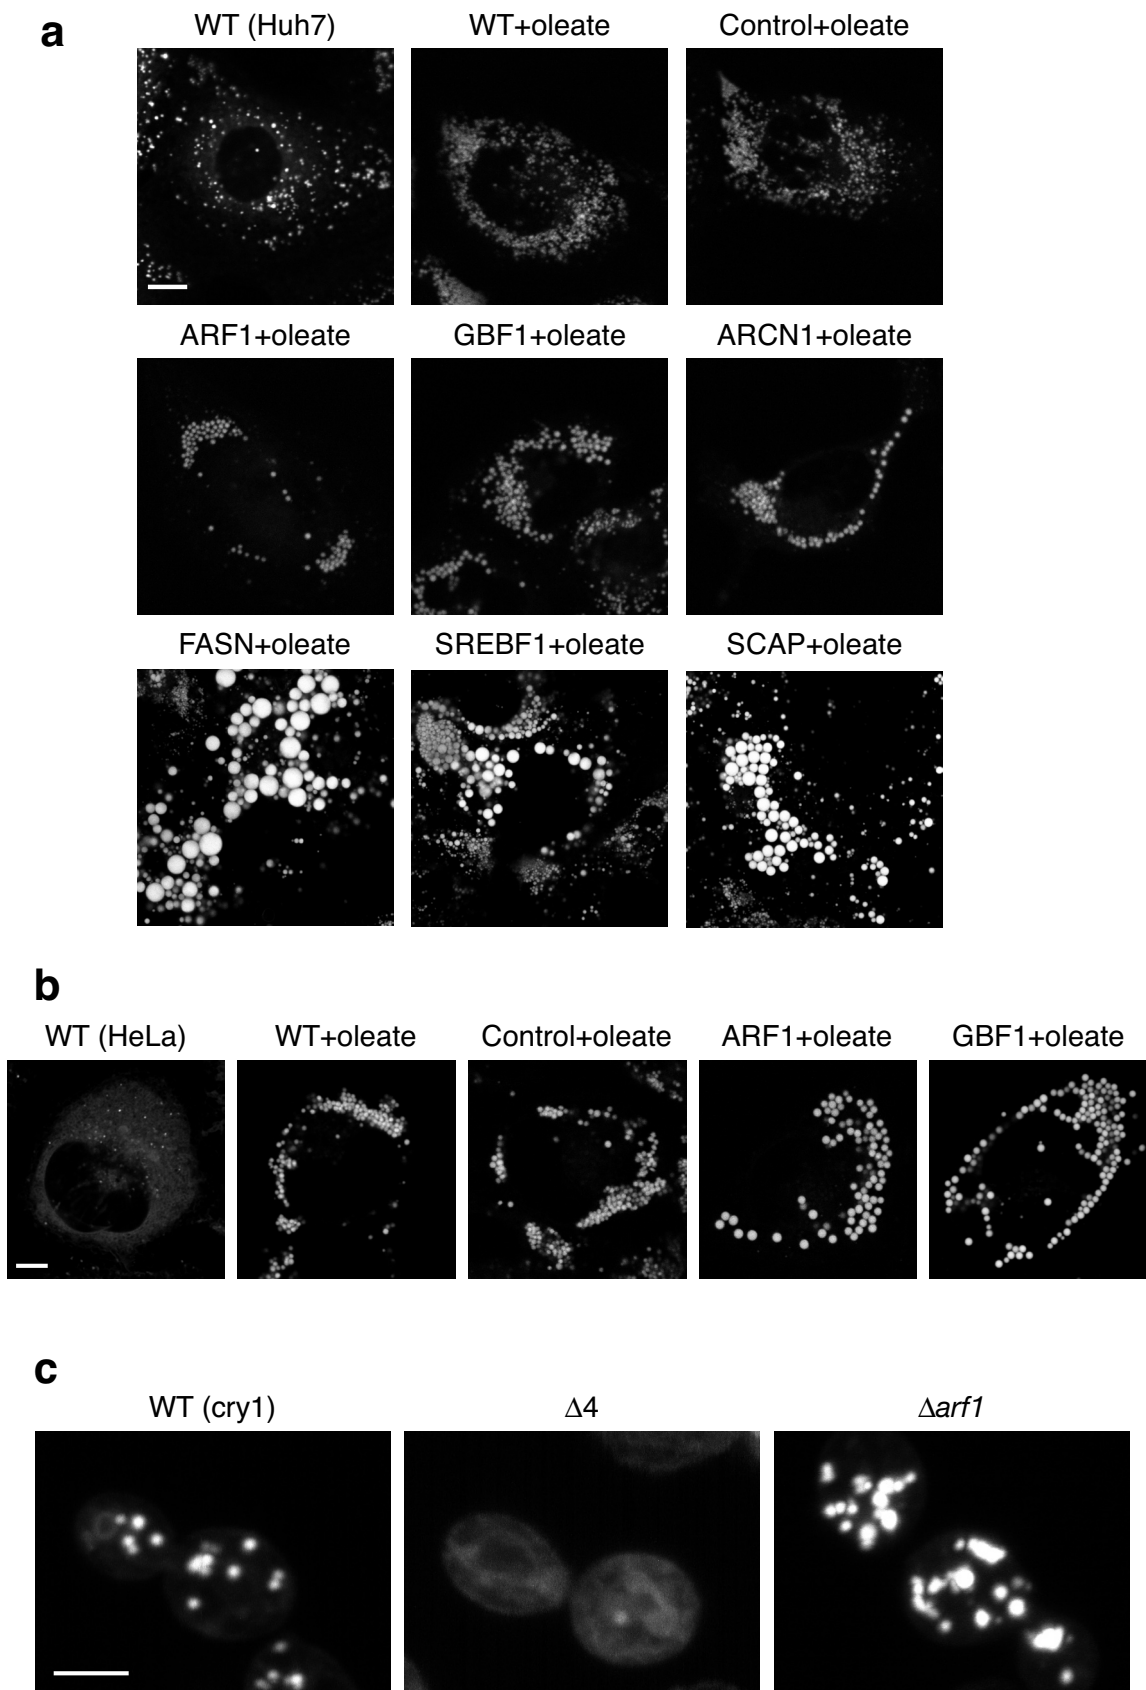Farese *et al*, Figure S4

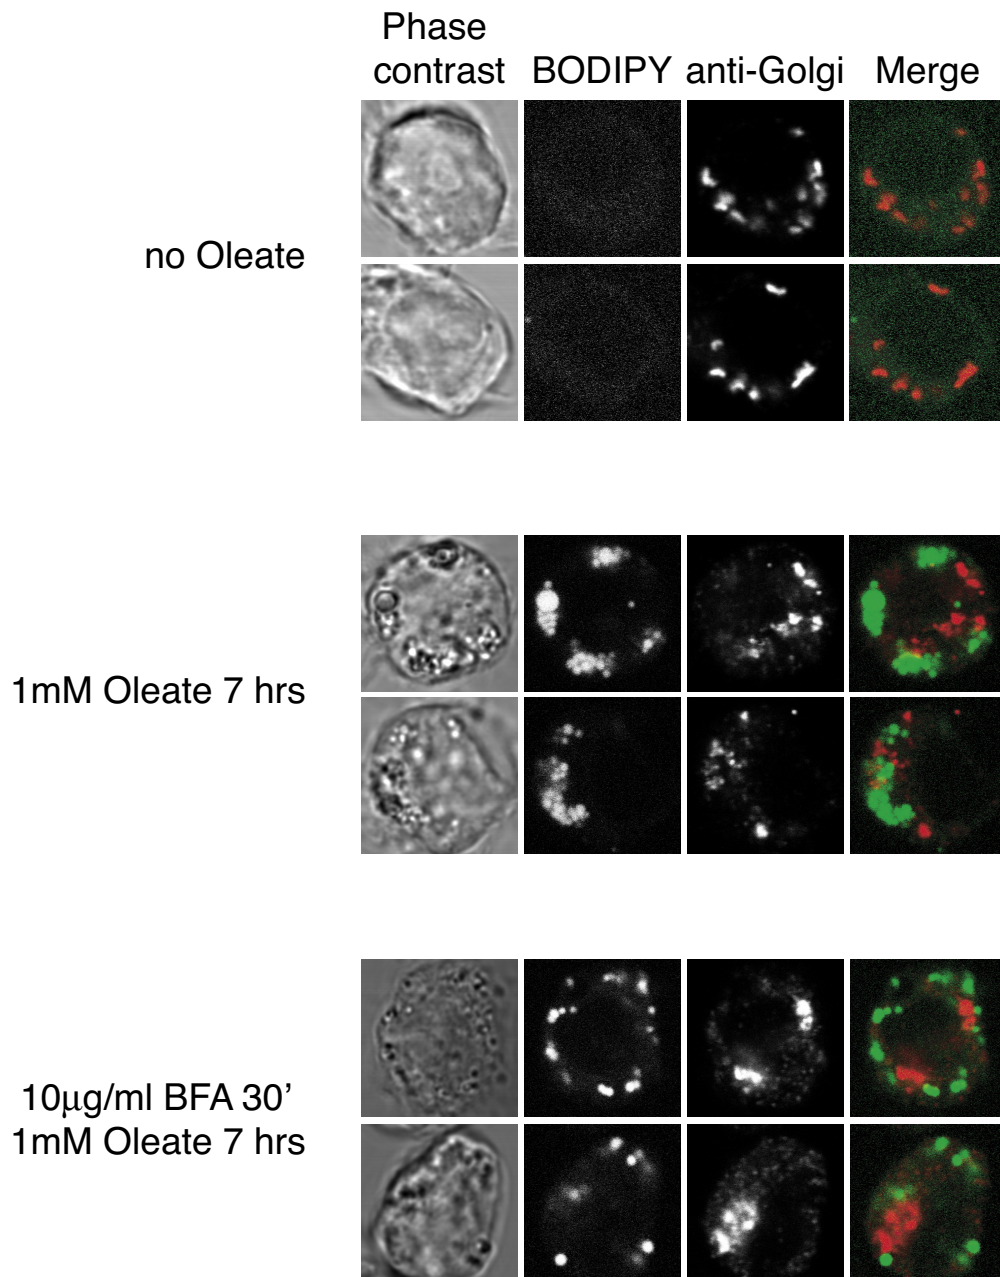Farese *et al*, Figure S5
